# Supplementary material
Source: PubMed Central journal article supplement (PMC9264112)
Supplement: JZhejiangUnivSciB-23-7-529-s001.pdf [file JZhejiangUnivSciB-23-7-529-s001.pdf]

## Co-regulation of circadian clock genes and microRNAs in bone metabolism

Tingting LI<sup>1,2</sup>, Shihua ZHANG<sup>3</sup>, Yuxuan YANG<sup>2</sup>, Lingli ZHANG<sup>2</sup>, Yu YUAN<sup>1</sup>, Jun ZOU<sup>2</sup>

<sup>1</sup>School of Exercise and Health, Guangzhou Sport University, Guangzhou 510500, China

<sup>2</sup>School of Kinesiology, Shanghai University of Sport, Shanghai 200438, China

<sup>3</sup>College of Graduate Education, Shandong Sport University, Shandong 250102, China

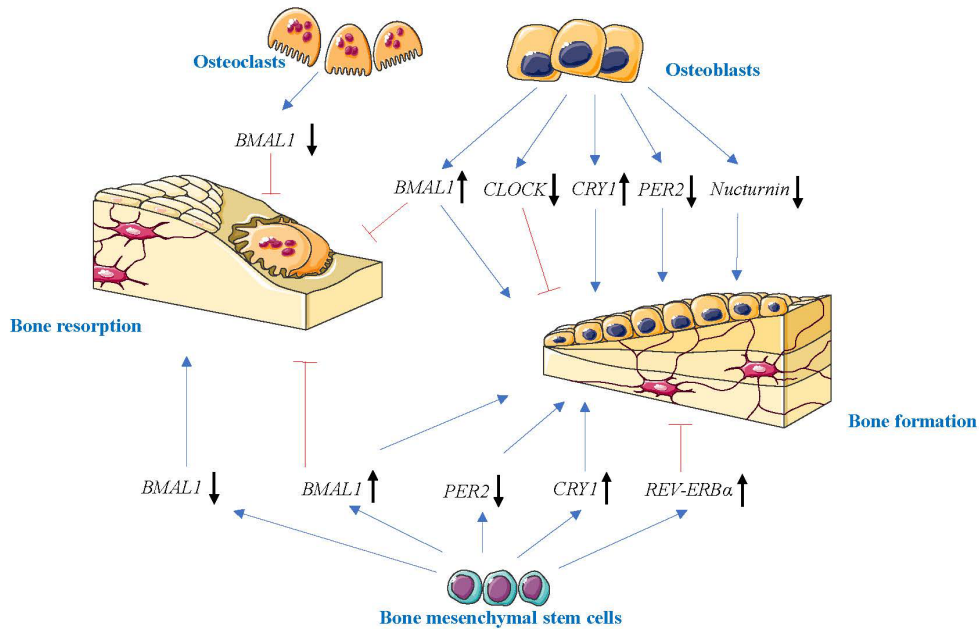

**Fig. S1** Schematic representation of circadian clock genes regulating bone metabolism. *BMAL1*: brain and muscle aryl hydrocarbon receptor nuclear translocator (ARNT)-like 1; *CLOCK*: circadian locomotor output cycles kaput; *CRY1*: cryptochrome 1; *PER2*: period 2; *REV-ERB $\alpha$* : nuclear receptor subfamily 1 group D 1 (*NR1D1*).

**Table S1 Regulatory role of some miRNAs in bone metabolism**

| MicroRNA     | Target                               | Description                                                            | Reference               |
|--------------|--------------------------------------|------------------------------------------------------------------------|-------------------------|
| miR-214      | ALP/PTEN                             | Promotes osteoclast activity                                           | Sun YQ et al., 2019     |
| miR-214      | Oterix/ATF4/PTEN/<br>β-catenin/FGFR1 | Attenuates the osteogenic effects of mechanical loading on osteoblasts | Yuan et al., 2019       |
| miR-378      |                                      | Promotes osteogenesis-angiogenesis coupling                            | Zhang et al., 2018      |
| miR-19b      | PTEN                                 | Increases bone formation                                               | Sun et al., 2020        |
| miR-96       | SOST                                 | Promotes osteoblast differentiation and bone formation                 | Ma et al., 2019         |
| miR-148b-3p  |                                      | Stimulates osteogenesis of hBMSC                                       | Mollazadeh et al., 2019 |
| miR-181a/b-1 |                                      | Enhances osteogenesis                                                  | Zheng et al., 2019      |
| miR-23a      | BMPR1B                               | Inhibits osteogenesis of PDLSCs                                        | Zhang et al., 2019      |
| miR-1297     | WNT5A                                | Accelerates the progression of osteoporosis                            | Wang et al., 2019       |
| miR-155      | LEPR                                 | Inhibits osteoclast activation and bone resorption                     | Mao et al., 2019        |
| miR-223      | NF1A/FGFR2/IKKα                      | Regulates the differentiation of both osteoblasts and osteoclasts      | Xie et al., 2015        |
| miR-144-5p   | Smad1                                | Reduces bone repair and regeneration                                   | Zhang et al., 2021      |
| miR-214-3p   | ATF4                                 | Inhibits osteoblastic bone formation                                   | Li et al., 2016         |

ALP: alkaline phosphatase; ATF4: activating transcription factor 4; BMPR1B: bone morphogenetic protein receptor type 1B; FGFR: fibroblast growth factor receptor; hBMSC: human bone marrow stromal cells; IKKα: nuclear factor κB kinase subunit-α; LEPR: leptin receptor; NF1A: nuclear factor 1 A-type; PDLSCs: periodontal mesenchymal stem cells; PTEN: phosphatase and tensin homolog; Smad1: SMAD family member 1; SOST: sclerostin; WNT5A: Wnt family member 5A.

## References

- Li DF, Liu J, Guo BS, et al., 2016. Osteoclast-derived exosomal miR-214-3p inhibits osteoblastic bone formation. *Nat Commun*, 7:10872.  
<https://doi.org/10.1038/ncomms10872>
- Mao ZX, Zhu YH, Hao WM, et al., 2019. MicroRNA-155 inhibition up-regulates LEPR to inhibit osteoclast activation and bone resorption via activation of AMPK in alendronate-treated osteoporotic mice. *IUBMB Life*, 71(12):1916-1928.  
<https://doi.org/10.1002/iub.2131>
- Mollazadeh S, Bazzaz BSF, Neshati V, et al., 2019. Overexpression of microRNA-148b-3p stimulates osteogenesis of human bone marrow-derived mesenchymal stem cells: the role of microRNA-148b-3p in osteogenesis. *BMC Med Genet*, 20:117.  
<https://doi.org/10.1186/s12881-019-0854-3>
- Ma S, Wang DD, Ma CY, et al., 2019. MicroRNA-96 promotes osteoblast differentiation and bone formation in ankylosing spondylitis mice through activating the Wnt signaling pathway by binding to SOST. *J Cell Biochem*, 120(9):15429-15442.  
<https://doi.org/10.1002/jcb.28810>
- Sun MG, Hu LQ, Wang S, et al., 2020. Circulating microRNA-19b identified from osteoporotic vertebral compression fracture patients increases bone formation. *J Bone Miner Res*, 35(2):306-316.  
<https://doi.org/10.1002/jbmr.3892>

- Sun YQ, Kuek V, Liu YH, et al., 2019. MiR-214 is an important regulator of the musculoskeletal metabolism and disease. *J Cell Physiol*, 234(1):231-245.  
<https://doi.org/10.1002/jcp.26856>
- Wang Q, Wang CH, Meng Y, 2019. MicroRNA-1297 promotes the progression of osteoporosis through regulation of osteogenesis of bone marrow mesenchymal stem cells by targeting WNT5A. *Eur Rev Med Pharmacol Sci*, 23(11):4541-4550.  
[https://doi.org/10.26355/eurrev\\_201906\\_18029](https://doi.org/10.26355/eurrev_201906_18029)
- Xie Y, Zhang LH, Gao YP, et al., 2015. The multiple roles of microRNA-223 in regulating bone metabolism. *Molecules*, 20(10):19433-19448.  
<https://doi.org/10.3390/molecules201019433>
- Yuan Y, Guo JM, Zhang LL, et al., 2019. MiR-214 attenuates the osteogenic effects of mechanical loading on osteoblasts. *Int J Sports Med*, 40(14):931-940.  
<https://doi.org/10.1055/a-1015-0285>
- Zhang B, Li YL, Yu Y, et al., 2018. MicroRNA-378 promotes osteogenesis-angiogenesis coupling in BMMSCs for potential bone regeneration. *Anal Cell Pathol (Amst)*, 2018:8402390.  
<https://doi.org/10.1155/2018/8402390>
- Zhang D, Wu YF, Li ZH, et al., 2021. MiR-144-5p, an exosomal miRNA from bone marrow-derived macrophage in type 2 diabetes, impairs bone fracture healing via targeting Smad1. *J Nanobiotechnology*, 19:226.  
<https://doi.org/10.1186/s12951-021-00964-8>
- Zhang YC, Li SY, Yuan SJ, et al., 2019. MicroRNA-23a inhibits osteogenesis of periodontal mesenchymal stem cells by targeting bone morphogenetic protein signaling. *Arch Oral Biol*, 102:93-100.  
<https://doi.org/10.1016/j.archoralbio.2019.04.001>
- Zheng HJ, Liu J, Tycksen E, et al., 2019. MicroRNA-181a/b-1 over-expression enhances osteogenesis by modulating PTEN/PI3K/AKT signaling and mitochondrial metabolism. *Bone*, 123:92-102.  
<https://doi.org/10.1016/j.bone.2019.03.020>
